# Supplementary material for: Rapid and sensitive detection of box turtles using an electrochemical DNA biosensor based on a gold/graphene nanocomposite
Source: publisher site journal article supplement (doi:10.3762/bjnano.13.120), 2022-12-06
Supplement: Additional file 1 [file 2190-4286-13-120-S1.pdf]

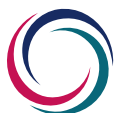

## Supporting Information

for

### **Rapid and sensitive detection of box turtles using an electrochemical DNA biosensor based on a gold/graphene nanocomposite**

Abu Hashem, M. A. Motalib Hossain, Ab Rahman Marlinda, Mohammad Al Mamun, Khanom Simarani and Mohd Rafie Johan

*Beilstein J. Nanotechnol.* **2022**, *13*, 1458–1472. doi:10.3762/bjnano.13.120

## Materials, methods and tables

## **Materials and Methods**

### **Materials**

All the chemicals were of analytical grade. NaOH, KCl, KNO<sub>3</sub>, K<sub>4</sub>[Fe(CN)<sub>6</sub>], H<sub>2</sub>SO<sub>4</sub>, HCl, Na<sub>2</sub>HPO<sub>4</sub>·7H<sub>2</sub>O, KH<sub>2</sub>PO<sub>4</sub>, NaH<sub>2</sub>PO<sub>4</sub>·H<sub>2</sub>O were purchased from Merck (Germany). NaCl was purchased from John Kollin (USA) and Na<sub>2</sub>HPO<sub>4</sub> and trisodium citrate from System (Malaysia). Graphene was synthesised in this laboratory and AuNPs were purchased from Cytodiagnosics (Canada). Tris (2-carboxyethyl) phosphine (TCEP) was purchased from Acros Organics, Thermo Fisher scientific (Malaysia). All aqueous solutions were prepared with 18.2 MΩ cm ultra-pure water from PURELAB Classic (ELGA VEOLIA, UK).

### **Apparatus**

Cyclic voltammetry (CV), DPV, and electrochemical impedance spectroscopy (EIS) were conducted by using the Metrohm μAutolab potentiostat/galvanostat with the NOVA 2.1.4 software (Metrohm, Switzerland). SPCE was collected from Metrohm (Switzerland). Other equipment used were a pH metre from Sartorius (Germany), a microcentrifuge from Sigma (Germany), an analytical balance from Merck (Germany), and a stirrer from PMC (Barnstead/Thermolyne, USA).

**Table S1:** Comparison of FTIR peaks for different nanoparticles and their composites.

| <b>Materials</b> | <b>Major peaks (at cm<sup>-1</sup>)</b> |                    |      |                               |      |                               |                     |           |     |     |     |
|------------------|-----------------------------------------|--------------------|------|-------------------------------|------|-------------------------------|---------------------|-----------|-----|-----|-----|
| Gr               | 3734                                    | 2357<br>(downward) | 2165 | 1964                          | 1561 | 1397                          | 1162                | 957       | 737 | 679 | 613 |
| AuNPs/Gr         | 3704                                    | 2299<br>(downward) | 2159 | 1986                          | 1586 | 1411                          | 1149                | 920       | 721 | 671 | 606 |
| DNA/AuNPs/Gr     | 3721                                    | 2310<br>(upward)   | 2019 | 1922<br>(almost<br>disappear) | 1569 | 1413<br>(Almost<br>disappear) | 1254<br>(disappear) | disappear | 795 | 721 | 626 |

**Table S2:** Peak current and current density of the hybridised DNAs based on DPV.

| Sl. | Nucleotide sources | Peak current ( $\mu\text{A}$ ) | Peak current density ( $\mu\text{A}/\text{cm}^2$ ) |
|-----|--------------------|--------------------------------|----------------------------------------------------|
| 1   | ssBT               | 3.61                           | 32.82                                              |
| 2   | dsBTRC             | 20.06                          | 182.36                                             |
| 3   | dsPK1MN            | 6.42                           | 58.36                                              |
| 4   | dsPK3MN            | 4.11                           | 37.36                                              |
| 5   | dsNC               | 3.69                           | 33.55                                              |
| 6   | dsCW               | 4.61                           | 41.91                                              |
| 7   | dsBF               | 4.81                           | 43.73                                              |
| 8   | dsHR               | 4.69                           | 42.64                                              |
| 9   | dsDK               | 4.31                           | 39.18                                              |

**Table S3:** Peak current and current density for sensitivity analysis based on DPV results.

| Sl. | Nucleotide (concentration) | Peak current ( $\mu\text{A}$ ) | Peak current density ( $\mu\text{A}/\text{cm}^2$ ) |
|-----|----------------------------|--------------------------------|----------------------------------------------------|
| A   | $1 \times 10^{-15}$        | 6.38                           | 58.00                                              |
| B   | $1 \times 10^{-14}$        | 6.57                           | 59.73                                              |
| C   | $1 \times 10^{-13}$        | 6.96                           | 63.27                                              |
| D   | $1 \times 10^{-12}$        | 7.51                           | 68.27                                              |
| E   | $1 \times 10^{-11}$        | 8.27                           | 75.18                                              |
| F   | $1 \times 10^{-10}$        | 9.86                           | 89.64                                              |
| G   | $1 \times 10^{-9}$         | 11.98                          | 108.91                                             |
| H   | $1 \times 10^{-8}$         | 13.33                          | 121.18                                             |
| I   | $1 \times 10^{-7}$         | 15.17                          | 137.91                                             |
| J   | $1 \times 10^{-6}$         | 16.81                          | 152.82                                             |
| K   | $5 \times 10^{-6}$         | 18.84                          | 171.27                                             |
| L   | $1 \times 10^{-5}$         | 19.32                          | 175.64                                             |

**Table S4:** Peak current and current density for real samples related to BT.

| <b>Sl.</b> | <b>Samples</b> | <b>Peak current (<math>\mu\text{A}</math>)</b> | <b>Peak current density (<math>\mu\text{A}/\text{cm}^2</math>)</b> |
|------------|----------------|------------------------------------------------|--------------------------------------------------------------------|
| 1          | ssBT           | 3.2                                            | 29.09                                                              |
| 2          | dsBTS          | 14.88                                          | 135.27                                                             |
| 3          | dsCWS          | 4.41                                           | 40.09                                                              |
| 4          | dsBFS          | 4.93                                           | 44.82                                                              |
| 5          | dsHRS          | 4.55                                           | 41.36                                                              |
| 6          | dsDKS          | 4.09                                           | 37.18                                                              |
